# Supplementary material for: Exploiting the equilibrium dynamics in the self-assembly of inorganic macrocycles based upon polyoxothiometalate building blocks
Source: Royal Society of Chemistry journal article supplement (doi:10.1039/c6cc01041e), 2016-01-01
Supplement: c6cc01041e1.pdf [file c6cc01041e1.pdf]

## Supporting Information

### Exploiting the Equilibrium Dynamics in the Self-Assembly of Inorganic Macrocycles based upon Polyoxothiometalate Building Blocks

Hongying Zang, Andrew Surman, Deliang Long, Leroy Cronin, Haralampos N. Miras\*

WestCHEM, School of Chemistry, The University of Glasgow, Glasgow, UK, G12 8QQ. E-mail: [Charalampos.moiras@Glasgow.ac.uk](mailto:Charalampos.moiras@Glasgow.ac.uk)

#### Synthesis of compounds

##### Synthesis of $[\text{N}(\text{CH}_3)_4]\text{K}_3[\text{Mo}_2\text{O}_2\text{S}_2]_8(\text{OH})_{16}(\text{C}_4\text{O}_4)_2 \cdot 34\text{H}_2\text{O}$ $\{\text{Mo}_{16}\}$ (1)

###### *Method 1:*

The solution containing crystals of  $\{\text{Mo}_{14}\}$  was filtered and kept at 18 °C for approximately one month during which period yellow block crystals suitable for X-ray diffraction were formed.

###### *Method 2:*

Compound  $\{\text{Mo}_{14}\}$  (75 mg, 0.025 mmol) was dissolved in 15 mL aqueous solution of KCl (0.5 M) and then ultrasonicated for 30 min. The solution was adjusted to pH ca. 5 using 1 M  $\text{K}_2\text{CO}_3$ , filtered and kept at 18°C for 22 days. Yellow block crystals suitable for X-ray were isolated. Yield: 67mg, 73.1%.

###### *Method 3:*

Squaric acid (0.22 g, 1.9 mmol) and 7 mL (0.14 M)  $[\text{Mo}_2\text{O}_2\text{S}_2(\text{H}_2\text{O})_6]\text{X}_2$  (where X =  $\text{Cl}^-$  and/or  $\text{I}^-$ ) were dissolved in 20 mL of distilled water. Then KCl (2.0 g, 26.8 mmol) was added into the above solution. The pH of the solution was adjusted to 5.0 with 1 M  $\text{K}_2\text{CO}_3$ . The solution was stirred at room temperature for 1 h, and kept at 18°C for 28 days. Yellow block crystals were isolated from the mother liquor. (Yield: 90 mg, 20.4%). Elemental Analysis ( $\text{C}_{12}\text{H}_{96}\text{K}_3\text{Mo}_{16}\text{NO}_{74}\text{S}_{16}$ , FW: 3604.24 g/mol) EA (cal.): C:

4.00; H: 2.68; N: 0.39; S: 14.23, K: 3.25, Mo: 42.59; EA (exp.): C: 4.17; H: 2.34; N: 0.36; K: 3.56; Mo: 42.92. IR (KBr,  $\text{cm}^{-1}$ ): 3408.6 (m), 1628.6 (m), 1513.9 (s), 941.1 (sh), 491.8 (m).

### **Synthesis of $[\text{N}(\text{CH}_3)_4]_2\{(\text{Mo}_2\text{O}_2\text{S}_2)_6(\text{OH})_{12}(\text{CH}_3\text{COO})_2\} \cdot 24\text{H}_2\text{O} \{\text{Mo}_{12}(\text{Ac})_2\}$ (2)**

$\text{CH}_3\text{COONa}$  (0.223 g, 2.72 mmol) was dissolved in 10 mL deionized water. 7 mL  $[\text{Mo}_2\text{O}_2\text{S}_2(\text{H}_2\text{O})_6]\text{X}_2$  (where X =  $\text{Cl}^-$  and/or  $\text{I}^-$ ) diluted with 5 mL deionized water was added dropwise into the above solution. The solution was adjusted with 1 M  $\text{K}_2\text{CO}_3$  to pH= 4.5 and the solution was stirred at room temperature for 1 hour. The solution was kept in a 50 mL conical flask at 18 °C for 2 weeks where orange block crystals were isolated. Yield: 100 mg, 24.0 % based on  $\text{Mo}^{\text{V}}$ . Elemental analysis for  $\text{C}_{12}\text{H}_{90}\text{Mo}_{12}\text{O}_{52}\text{S}_{12}\text{N}_2$ , FW: 2630.90 g/mol, EA(cal.): C: 5.48; H: 3.45; Mo: 43.76; N: 1.06 % ; EA (exp.): C: 5.42; H: 3.52; Mo: 44.35; N: 0.99%. IR (KBr,  $\text{cm}^{-1}$ ): 3357.5 (m), 1515.8 (m), 1481.1 (m), 1418.4 (m), 942.1 (sh), 667.3 (w), 520.7 (sh).

### **Synthesis of $(\text{NMe}_4)_4\{[(\text{Mo}_2\text{S}_2\text{O}_2)(\text{OH})_2]_7(\text{C}_4\text{O}_4)_2(\text{H}_2\text{O})_2\} \cdot 13\text{H}_2\text{O} \{\text{Mo}_{14}\}$ (3)**

The  $\{\text{Mo}_{14}\}$  (3) ring has been synthesized according to the previously described procedure [*J. Am. Chem. Soc.*, 2012, **134**, 11376-11379] as follows:

$\text{C}_4\text{O}_4\text{H}_2$  (0.2 g, 1.8 mmol) was dissolved in 10 mL distilled water and the pH was adjusted to 7 by addition of 1M  $\text{K}_2\text{CO}_3$ .  $[\text{Mo}_2\text{S}_2\text{O}_2(\text{H}_2\text{O})_6]\text{X}_2$  (where X =  $\text{Cl}^-$  and/or  $\text{I}^-$ ) solution 7.4 mL diluted with 10 mL was added dropwise into the above solution giving an orange and clear solution. The pH of the solution was adjusted to (c.a.) 5 with 1M  $\text{K}_2\text{CO}_3$  and heat it at 60 °C under stirring for 1h. Then the reaction mixture was filtered and the filtrate was kept at 18 °C for 50 days during which period of time yellow plate-shaped crystals suitable for X-ray crystallography were isolated.

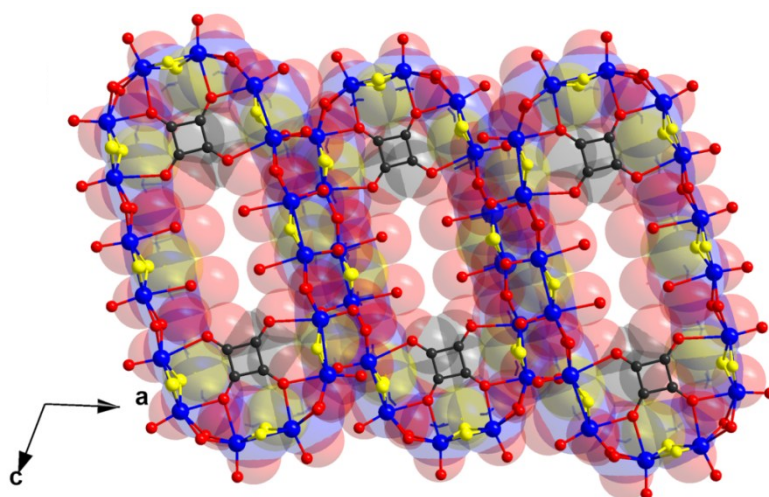

**Fig. S1** The packing mode for **1** {Mo<sub>16</sub>} along the b axis.

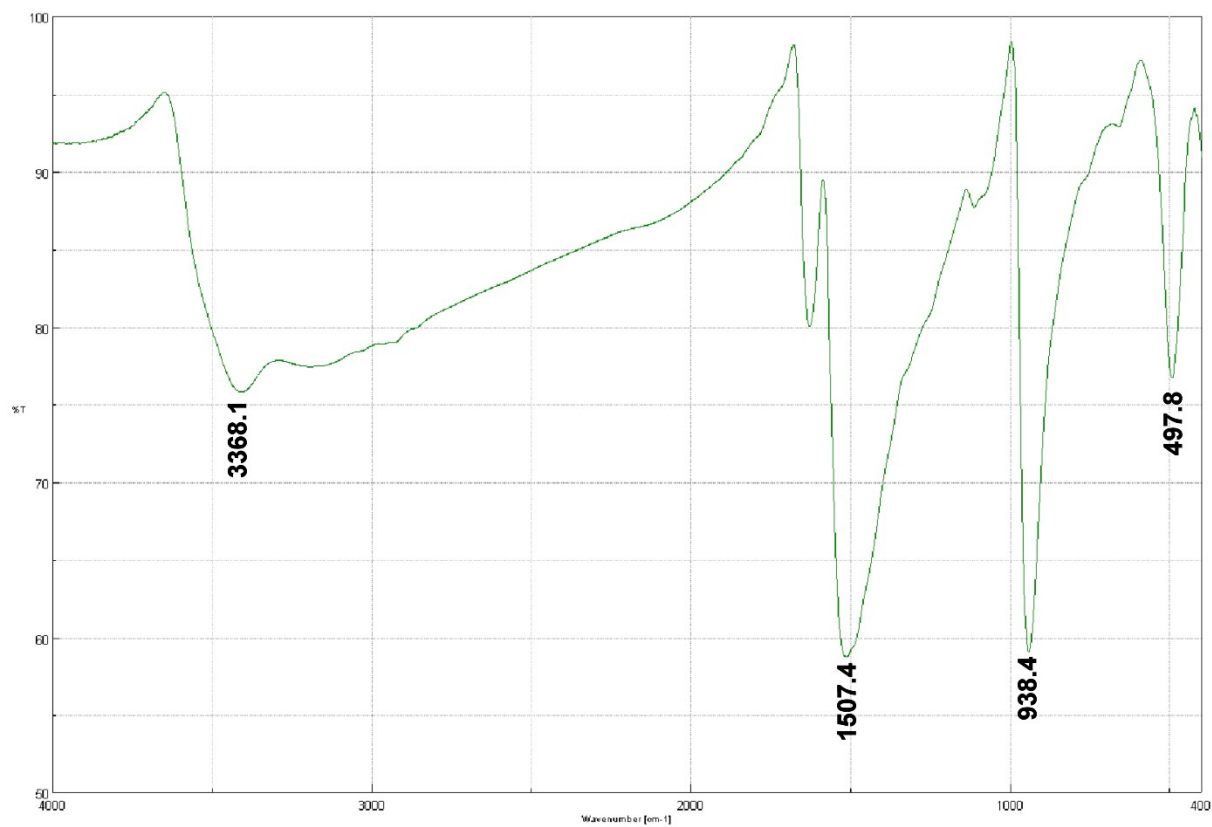

**Fig. S2** IR spectrum for compound **1**.

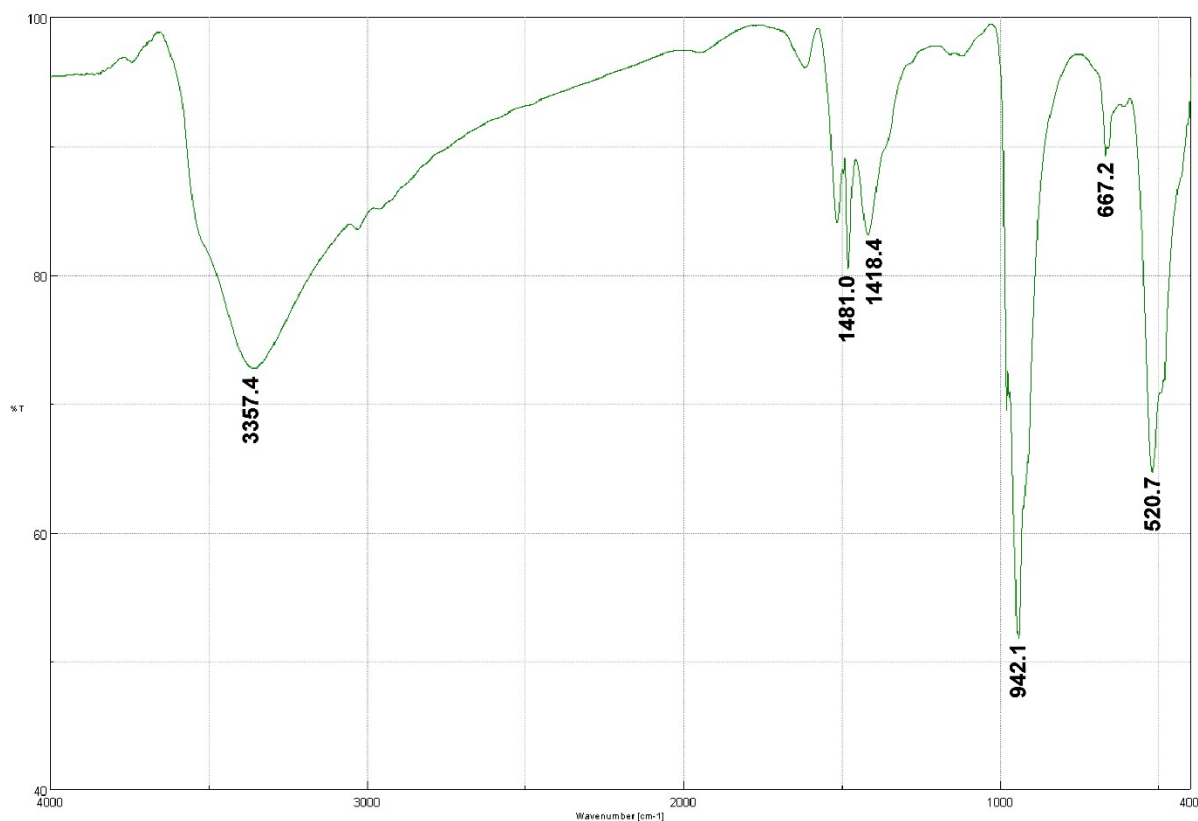

**Fig. S3** IR spectrum for compound **2**.

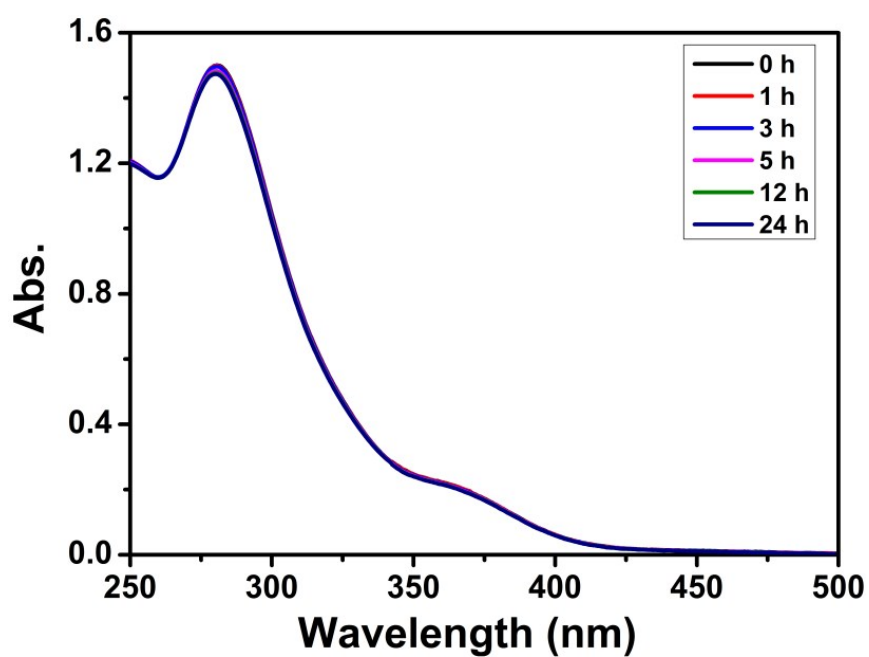

**Fig. S4** UV-vis spectra for compound **1**  $\{\text{Mo}_{16}\}$  in 0.1 M KOAc-HOAc solution (concentration  $10^{-4}$  M). One strong absorption peak at 280 nm and a shoulder centred at 365 nm, were observed, respectively. The location and intensity of the peaks remained unchanged as a function of the time demonstrating the stability of the cluster in solution.

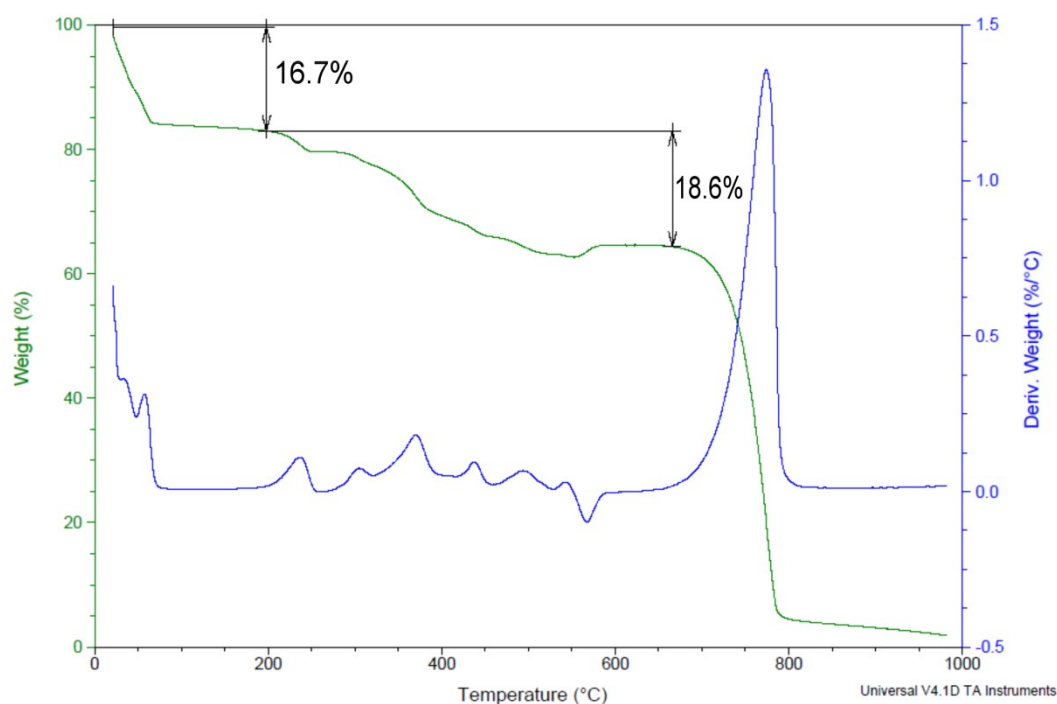

**Fig.S5** Thermogravimetric analysis for compound **1**. The first weight loss of 16.7 % can be attributed to the loss of 34 crystal lattice water molecules followed by the loss of 11.7 % attributed to the loss of the organic content ( $\text{Me}_4\text{N}^+$  and  $\text{C}_4\text{O}_4^{2-}$ ) in the form of  $\text{C}_x\text{H}_y$ ,  $\text{NH}_3$  and  $\text{CO}_2$  and 7.1% attributed to the partial elimination of the sulphur content as  $4 \times \text{SO}_2$  in three overlapping steps. Finally, at 795 °C we can observe a phase change as expected associated to the formation of  $\text{MoO}_3$ .

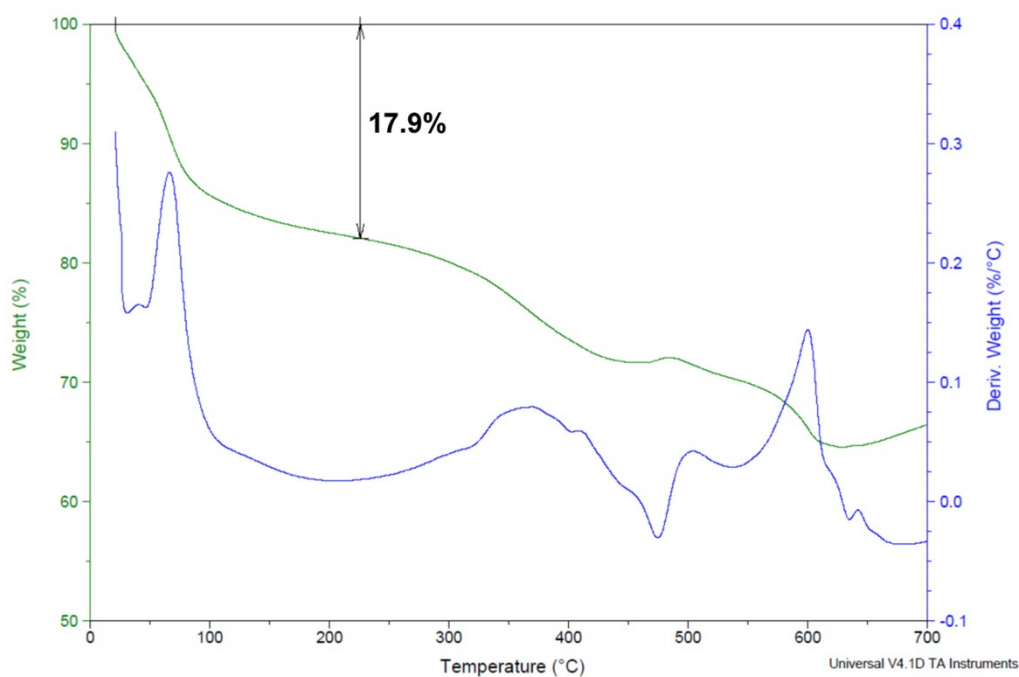

**Fig. S6** Thermogravimetric analysis for compound **2**. The first weight loss of 17.9 % can be attributed to the loss of 25 water molecules followed by the loss of 10.0 %

attributed to the loss of the organic content ( $\text{Me}_4\text{N}^+$  and  $\text{CH}_3\text{COO}^-$ ) in the form of  $\text{C}_x\text{H}_y$ ,  $\text{NH}_3$  and  $\text{CO}_2$  whilst the final loss of 8% can be attributed to the partial elimination of the sulphur content as  $\text{SO}_2$  (8%).

## Mass spectra study

### Sample Preparation

Compounds **1** and **2** were dissolved in methanol at approx. 0.1 mg/ml (traces of acetonitrile present; less than 0.5 vol%). The analyte solution was filtered through a syringe filter (0.2  $\mu\text{m}$ ) before infused into the spectrometer using a syringe pump at a flow rate of 5  $\mu\text{L} \cdot \text{min}^{-1}$ .

### MS and IMS-MS Settings (Compound 1)

Negative mode mass-spectrometry (MS) and ion-mobility mass-spectrometry (IMS-MS) measurements were performed on a Synapt™ G2 HDMS™ from Waters in 'Sensitivity' mode with the following settings:

**Ionization** Capillary voltage = 2.7 kV; Source temperature = 80 °C; Sampling cone = 20 V; Extraction cone = 4 V; Desolvation temperature = 120 °C; Trap collision energy = 0.0 V, except where noted ("CID" experiments); Transfer Collision energy = 0.0 V.

**TWIMS** Trap Gas Flow = 4 mL/min; Helium Cell Gas Flow = 180 mL/min; IMS Gas Flow 90 mL/min; IMS Wave Velocity 750 m/s; IMS Wave Height 40 V.

### MS spectrum

The spectrum below is typical of those observed for **1**. Most of the major peaks observed are broad and plausibly assigned as a continua resulting from a single anion with a range of different cations and/or neutral addenda (particularly solvent ions). IMS-MS and CID studies (*vide infra*) support the assignment of the broad peaks ca. 1000 Da ( $z = -3$ ) and 1500 Da ( $z = -2$ ) as corresponding to the intact  $\{\text{Mo}_{16}\}$  cluster with a variety of cations/solvent molecules (listed in blue), and most other peaks are assigned as fragments (some of the largest listed in red).

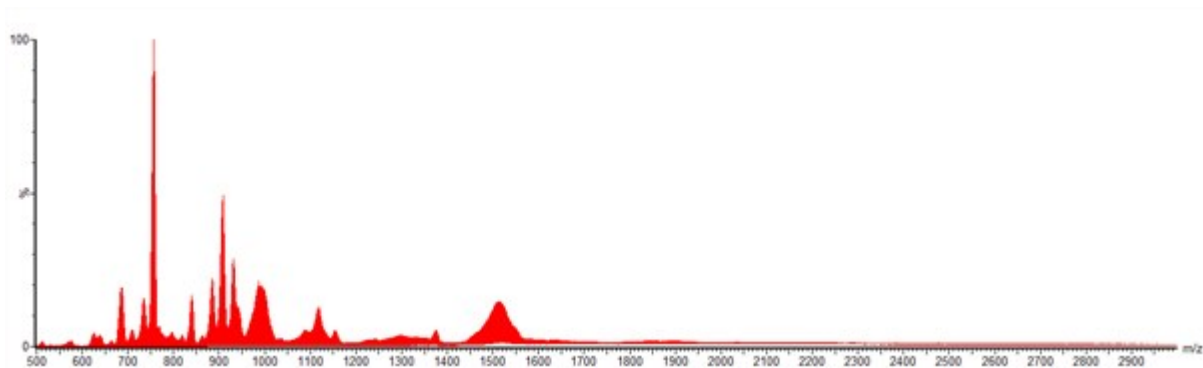

**Figure S7.** MS spectrum of Compound **1** in MeOH.

**Table S1** The peaks assignment for the mass spectra.

| <i>m/z</i> | <i>z</i> | Putative Ion Composition                                                                                                                                                   |
|------------|----------|----------------------------------------------------------------------------------------------------------------------------------------------------------------------------|
| 1506       | -2       | $[\text{N}(\text{CH}_3)_4]_2[(\text{Mo}_2\text{O}_2\text{S}_2)_8(\text{OH})_{16}(\text{C}_4\text{O}_4)_2](\text{CH}_3\text{OH})_2$                                         |
| 1508       | -2       | $[\text{N}(\text{CH}_3)_4]_2[(\text{Mo}_2\text{O}_2\text{S}_2)_8(\text{OH})_{16}(\text{C}_4\text{O}_4)_2](\text{H}_2\text{O})_2(\text{CH}_3\text{OH})$                     |
| 1510       | -2       | $[\text{N}(\text{CH}_3)_4]_2[(\text{Mo}_2\text{O}_2\text{S}_2)_8(\text{OH})_{16}(\text{C}_4\text{O}_4)_2](\text{H}_2\text{O})_4$                                           |
| 994        | -3       | $[\text{N}(\text{CH}_3)_4][(\text{Mo}_2\text{O}_2\text{S}_2)_8(\text{OH})_{16}(\text{C}_4\text{O}_4)_2](\text{H}_2\text{O})_2(\text{CH}_3\text{OH})(\text{CH}_3\text{CN})$ |
| 993        | -3       | $[\text{N}(\text{CH}_3)_4][(\text{Mo}_2\text{O}_2\text{S}_2)_8(\text{OH})_{16}(\text{C}_4\text{O}_4)_2](\text{H}_2\text{O})_4(\text{CH}_3\text{OH})$                       |
| 907        | -3       | $\text{K}[(\text{Mo}_2\text{O}_2\text{S}_2)_5(\text{OH})_{11}(\text{C}_4\text{O}_4)](\text{H}_2\text{O})_2$                                                                |
| 906        | -3       | $[\text{N}(\text{CH}_3)_4][(\text{Mo}_2\text{O}_2\text{S}_2)_5(\text{OH})_{11}(\text{C}_4\text{O}_4)]$                                                                     |
| 756        | -3       | $\text{K}_2 [(\text{Mo}_2\text{O}_2\text{S}_2)_4(\text{OH})_{10}(\text{C}_4\text{O}_4)]$                                                                                   |

IMS-MS spectrum

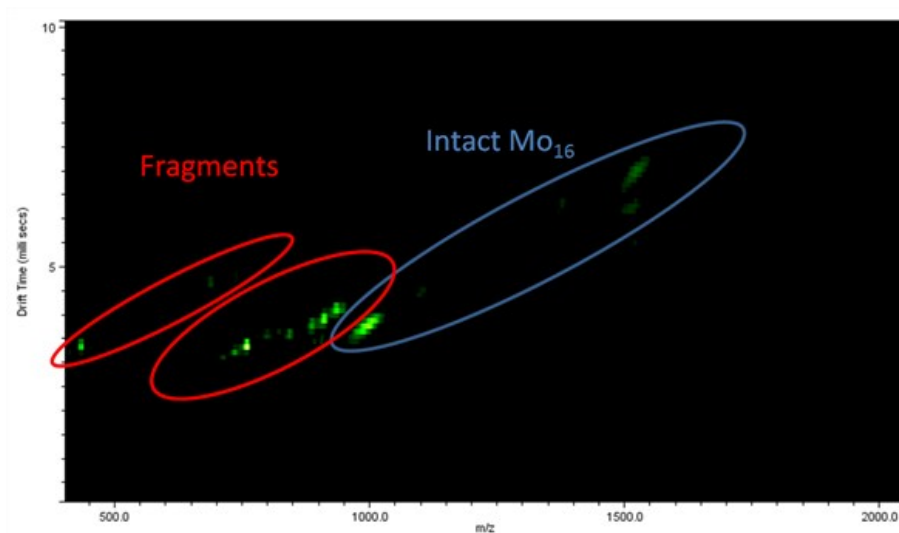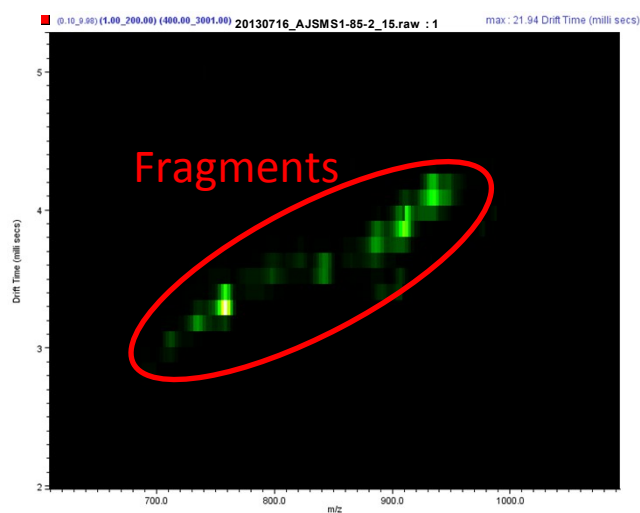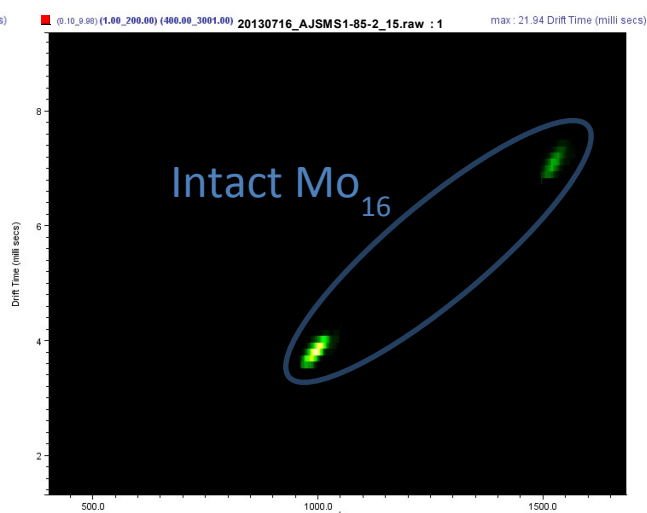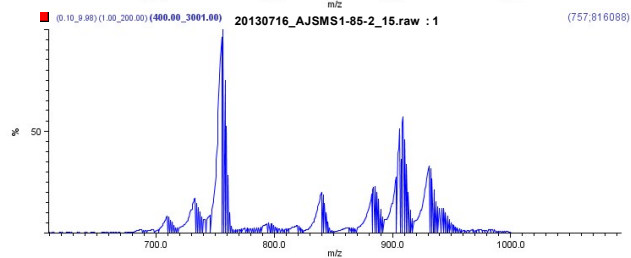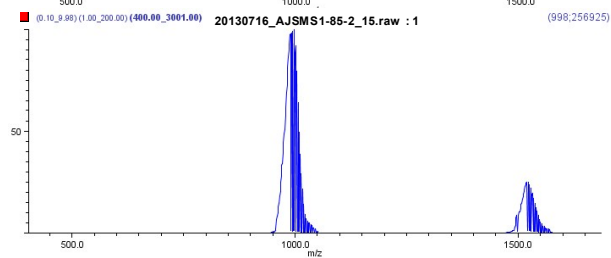



**Fig. S8.** IMS-MS spectrum of compound **1** in MeOH showing the relevant areas along with the associated spectra which can be assigned to the intact  $\{\text{Mo}_{16}\}$  cluster and its building block-based fragments.

#### Fragmentation (MS/MS) demonstrates presence of solvent molecules

In order to further confirm the putative assignment of peaks incorporating the intact  $\{\text{Mo}_{16}\}$  cluster as including a neutral solvent molecules, a narrow range of the peak at 1506  $\pm$  3 Da was selected using the instrument's quadrupole and subjected to collision-induced dissociation (CID) conditions (Trap Collision Energy = 15 V), leading to fragmentation. It is clear that the principal neutral loss (without fragmentation of the  $\{\text{Mo}_{16}\}$  cluster) correspond to species of mass 32 ( $\Delta m/z = 16$ ;  $z = 2$ ), consistent with loss of associated methanol molecules from the selected ions.

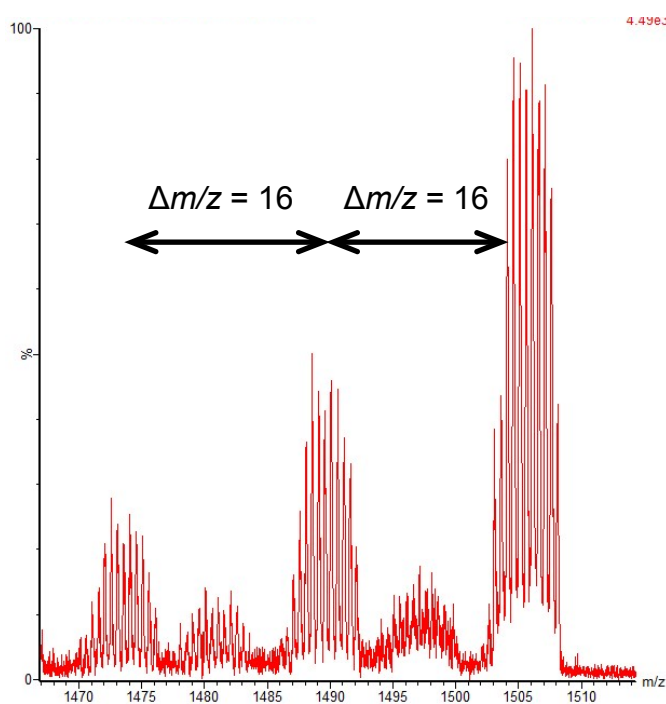

**Fig. S9** MS/MS spectrum of Compound **1** in MeOH (CID @ 15 V).

#### MS spectrum (Compound **2**)

Electrospray Ionisation Mass Spectrometry (ESI-MS) was performed using a Bruker micrOTOF-Q quadrupole time-of-flight mass spectrometer. Samples were dissolved in MeOH introduced into the MS at a dry gas temperature of 180 °C. The ion polarity for all MS scans recorded was negative, with the voltage of the capillary tip set at 4500 V, end plate offset at -500 V, funnel 1 RF at 400 Vpp and funnel 2 RF at 400 Vpp, hexapole RF at 200 Vpp, ion energy 5.0 eV, collision energy at 15 eV, collision cell RF at 2100 Vpp, transfer time at 120.0  $\mu$ s, and the pre-pulse storage time at 20.0  $\mu$ s.ode and analysed using the Bruker Daltonics v4.1 software.

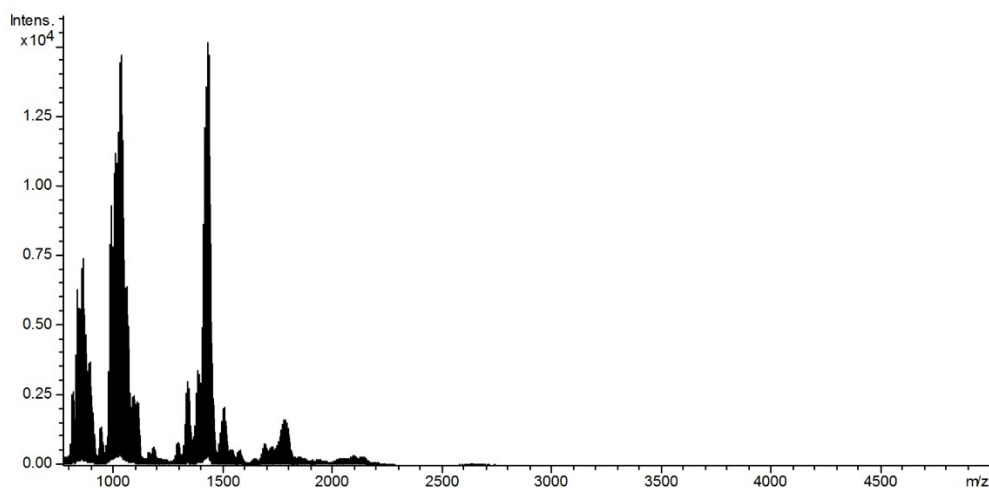

**Fig. S10.** MS spectrum of Compound **2** in MeOH.

**Table S2** The peaks assignment for the mass spectra.

| <i>m/z</i> | <i>z</i> | Putative Ion Composition                                                                               |
|------------|----------|--------------------------------------------------------------------------------------------------------|
| 1403.13    | -1       | $[\text{N}(\text{CH}_3)_4][(\text{Mo}_2\text{O}_2\text{S}_2)_4(\text{OH})_{10}](\text{CH}_3\text{OH})$ |
| 1505.20    | -1       | $[\text{N}(\text{CH}_3)_4]_2[(\text{Mo}_2\text{O}_2\text{S}_2)_4(\text{OH})_{12}\text{H}]$             |
| 1341.02    | -1       | $[(\text{Mo}_2\text{O}_2\text{S}_2)_4(\text{OH})_{11}\text{H}_2]$                                      |
| 1034.30    | -1       | $[(\text{Mo}_2\text{O}_2\text{S}_2)_3(\text{OH})_8\text{H}](\text{CH}_3\text{OH})$                     |

#### Electrochemical characterization

The cyclic voltammetry for the three compounds were conducted using The CHI 760D electrochemical equipment. The standard three-electrode

arrangement was employed with a Pt mesh auxiliary electrode, 1.5 mm glassy carbon working electrode, and Ag/AgCl reference electrode. All potentials are quoted relative to the Ag/AgCl reference electrode. The glassy carbon working electrodes (diameter 1.5 mm) were polished with alumina (3  $\mu\text{m}$ ) on polishing pads, rinsed with distilled water, and sonicated in  $\text{H}_2\text{O}$  and then acetone solution before each experiment.

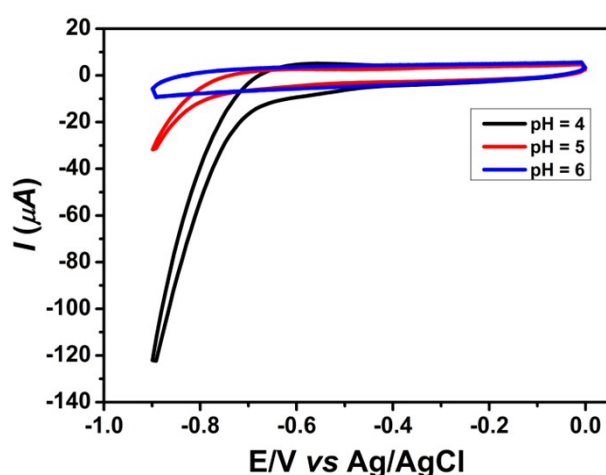

**Fig. 11** Cyclic voltammogram of  $3 \times 10^{-4}$  M of  $\{\text{Mo}_{16}\}$  taken in 0.1 M KOAc-HOAc aqueous solution at a scan rate of 100 mV/s.

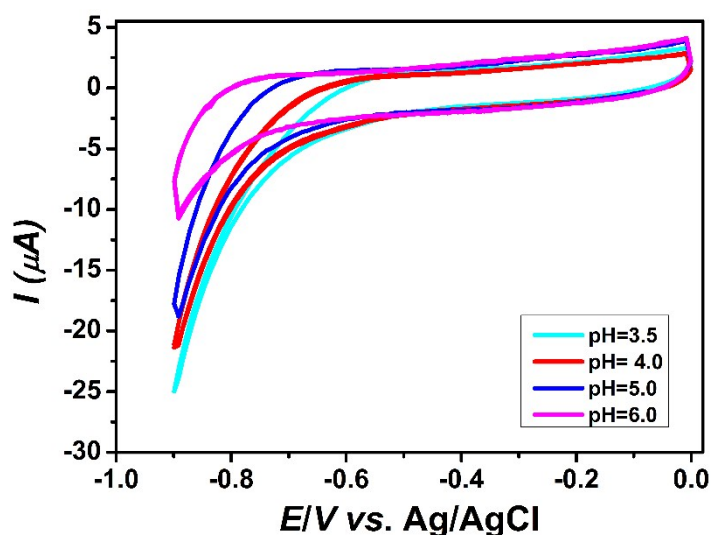

**Fig. 12** Cyclic voltammogram of  $3 \times 10^{-4}$  M of  $\{\text{Mo}_{12}\}$  taken in 0.1 M KOAc-HOAc aqueous solution at a scan rate of 100 mV/s.

The cyclic voltammograms (CVs) of compound the  $\{\text{Mo}_{16}\}$  ring was recorded in aqueous medium in the potential window of 0 to  $-0.90$  V vs. Ag/AgCl at a scan rate of 100 mV/s. The concentrations of the  $\{\text{Mo}_{16}\}$  used was  $3 \times 10^{-4} \text{ mol} \cdot \text{L}^{-1}$  and the pH

was adjusted in the range 4–6 by means of acetic acid (see ESI for further details). During pH 4-6, there are no noticeable reversible electrochemical processes is detected. The CV of compound  $\{Mo_{16}\}$  in the range 4-5 exhibit similar patterns when recorded in acidic aqueous electrolytes with a large pluri-electronic irreversible wave mainly attributed to the electrocatalytic reduction of protons into hydrogen. At pH=6, the reduction wave was not obvious; however, this catalytic wave gradually moves towards more positive potentials when the pH decreases, whereas its intensity dramatically grows, thus undergoing an enhanced catalysis in more acidic media. The electrochemistry of  $\{Mo_{12}\}$  exhibited a similar behaviour within the same pH range, however the catalytic wave appeared to be weaker.
